# Supplementary material
Source: PubMed Central journal article supplement (PMC5388601)
Supplement: NIHMS826844-supplement-SI.pdf [file NIHMS826844-supplement-SI.pdf]

Supporting Information

## **Peptide-Directed Assembly of Single-Helical Gold Nanoparticle Superstructures Exhibiting Intense Chiroptical Activity**

*Andrea D. Merg,<sup>†</sup> Jennifer C. Boatz,<sup>‡</sup> Abhishek Mandal,<sup>‡</sup> Gongpu Zhao,<sup>‡</sup> Soumitra Mokashi-Punekar,<sup>†</sup> Chong Liu,<sup>†</sup> Xianting Wang,<sup>‡</sup> Peijun Zhang,<sup>‡</sup> Patrick C. A. van der Wel,<sup>\*‡</sup> and Nathaniel L. Rosi<sup>\*†</sup>*

<sup>†</sup>Department of Chemistry, University of Pittsburgh, 219 Parkman Ave., Pittsburgh, Pennsylvania 15260, United States

<sup>‡</sup>Department of Structural Biology, University of Pittsburgh, School of Medicine, 3501 Fifth Avenue, Pittsburgh, Pennsylvania 15260, United States

## Supplementary Data

**a**

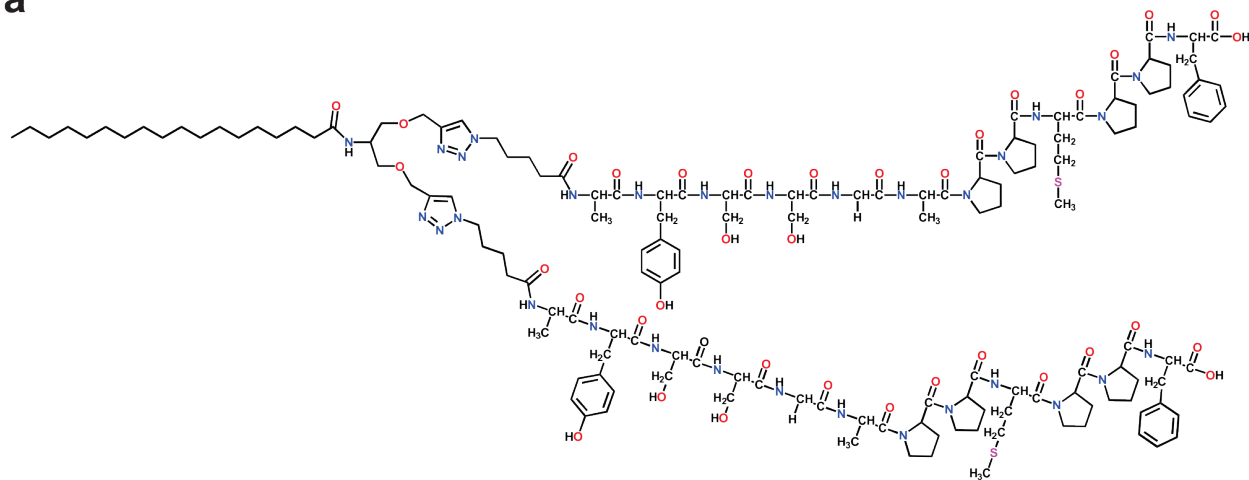

**b**

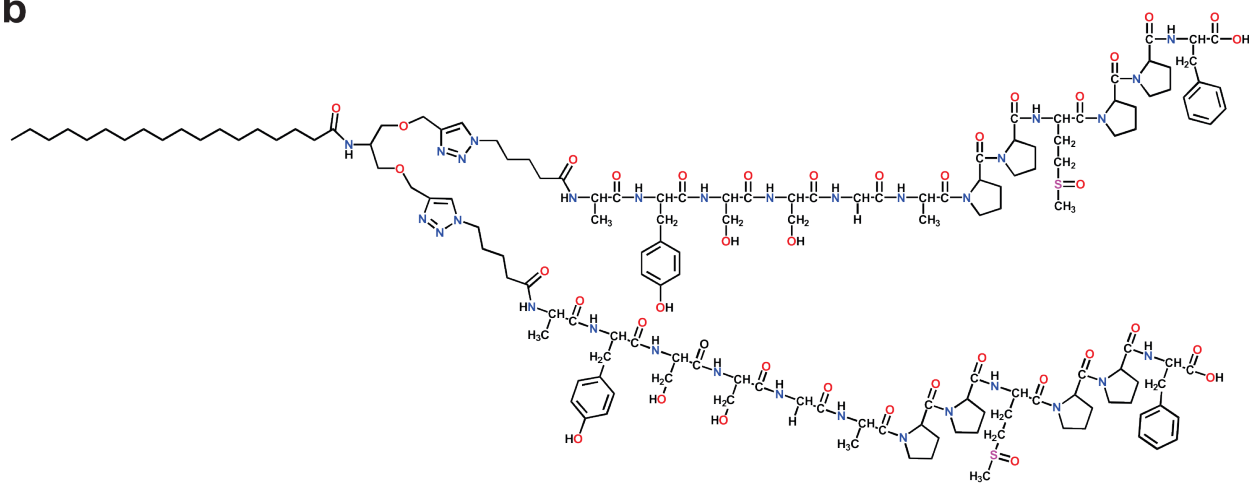

**Figure S1.** Chemical structure of (a)  $C_{18}-(PEP_{Au})_2$  and (b)  $C_{18}-(PEP_{Au}^{M-Ox})_2$ .

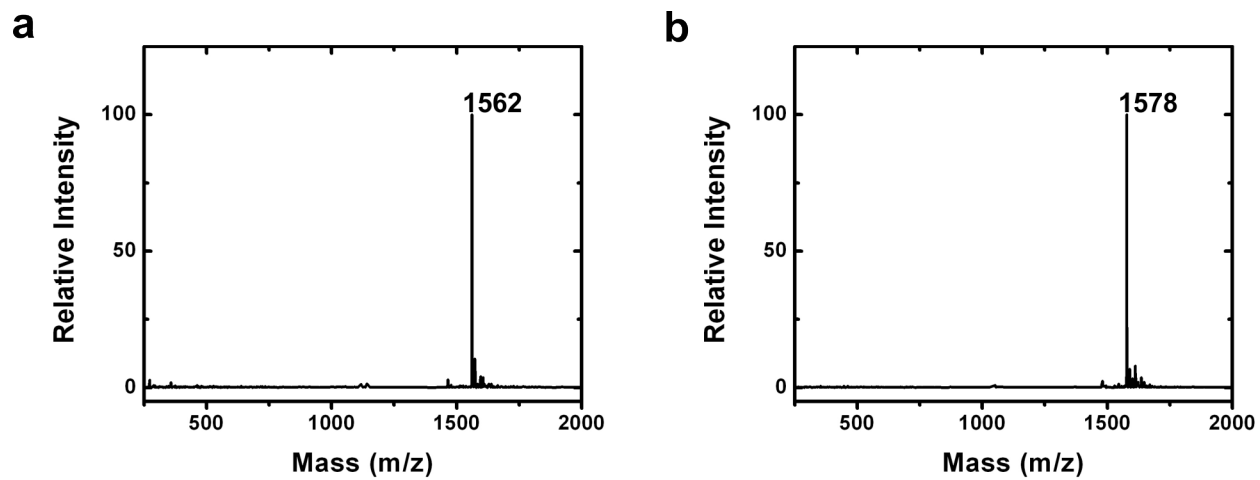

**Figure S2.** LCMS spectra of (a)  $C_{18}-(PEP_{Au})_2$ ,  $m/z = 1562$  ( $m/2$ ) and (b)  $C_{18}-(PEP_{Au}^{M-Ox})_2$ ,  $m/z = 1578$  ( $m/2$ ).

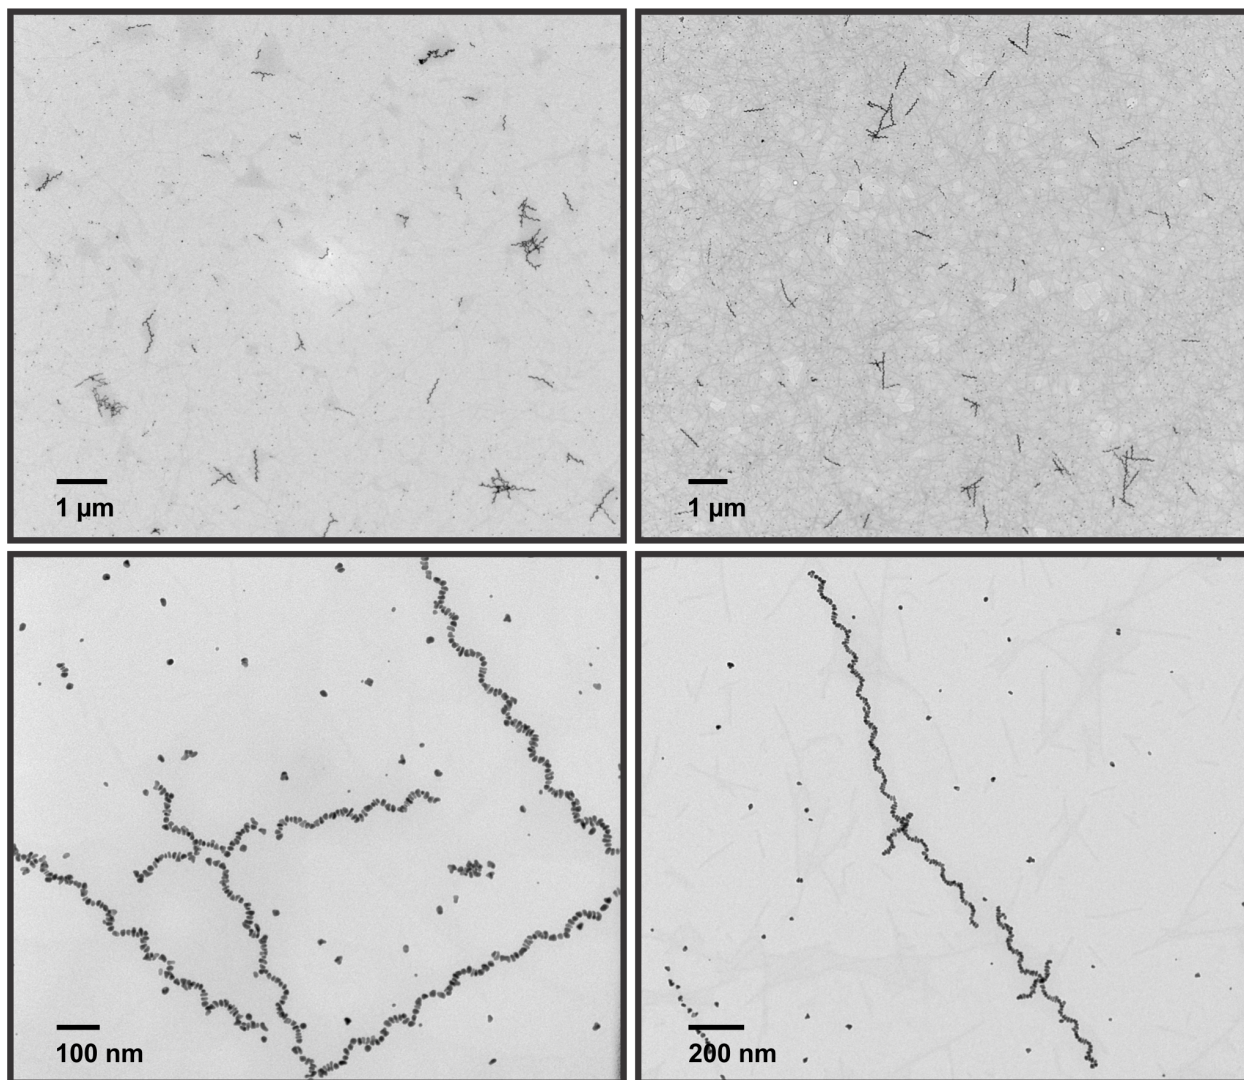

**Figure S3.** Additional TEM images of the single-helical superstructure at different magnifications.

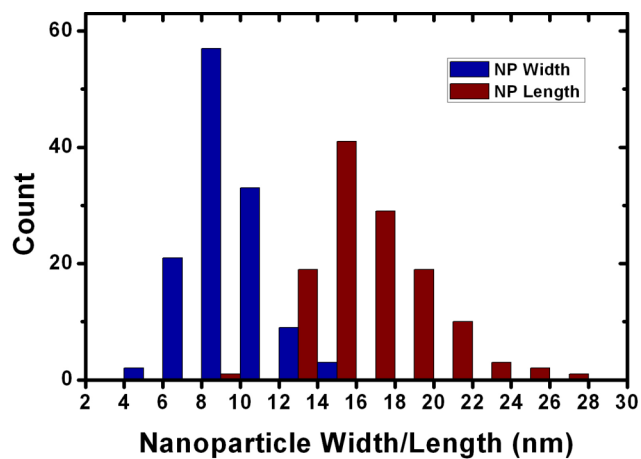

**Figure S4.** The nanoparticle length and widths of the single-helical superstructure were  $16.6 \pm 3.0$  nm and  $9.6 \pm 1.9$  nm, respectively, after 15 hours of reaction (based on 125 counts each).

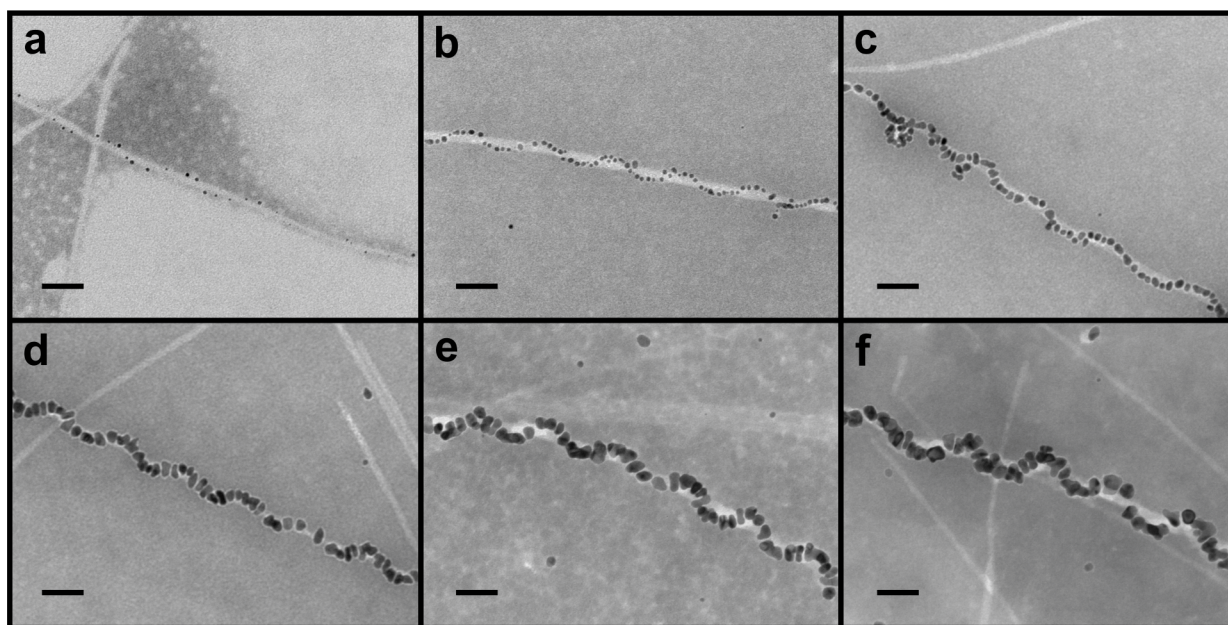

**Figure S5.** Negative stained TEM images of the single helices after (a) 0 min., (b) 30 min., (c) 2 hrs., (d) 5 hrs., (e) 8 hrs., and (f) 2 days of reaction at room temperature (scale bar = 50 nm).

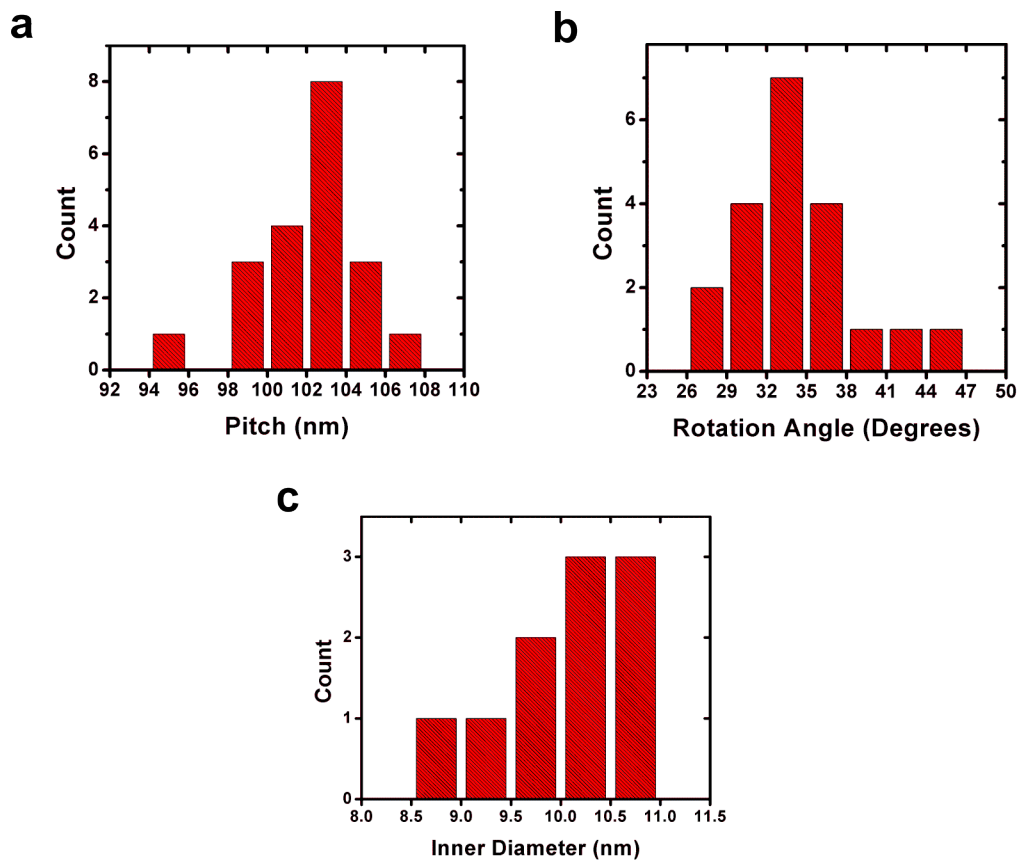

**Figure S6.** Structural parameters of single helices from cryo-ET: (a) the helical pitch was  $102.0 \pm 2.5$  nm, based on 20 counts; (b) rotation angle was  $34.3 \pm 4.9$  degrees, based on 20 counts; and (c) inner diameter was  $10.1 \pm 0.6$  nm, based on 10 counts.

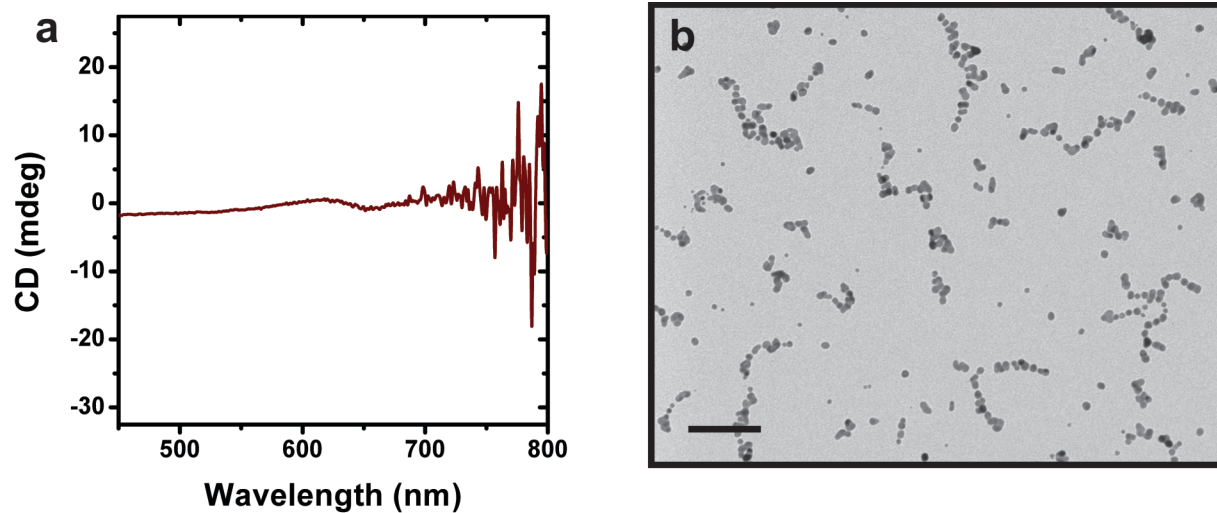

**Figure S7.** (a) CD spectrum of  $\text{PEP}_{\text{Au}}^{\text{M-ox}}$  capped gold nanoparticles and (b) their corresponding TEM image (scale bar = 100 nm). Both single particles and particle aggregates are observed.

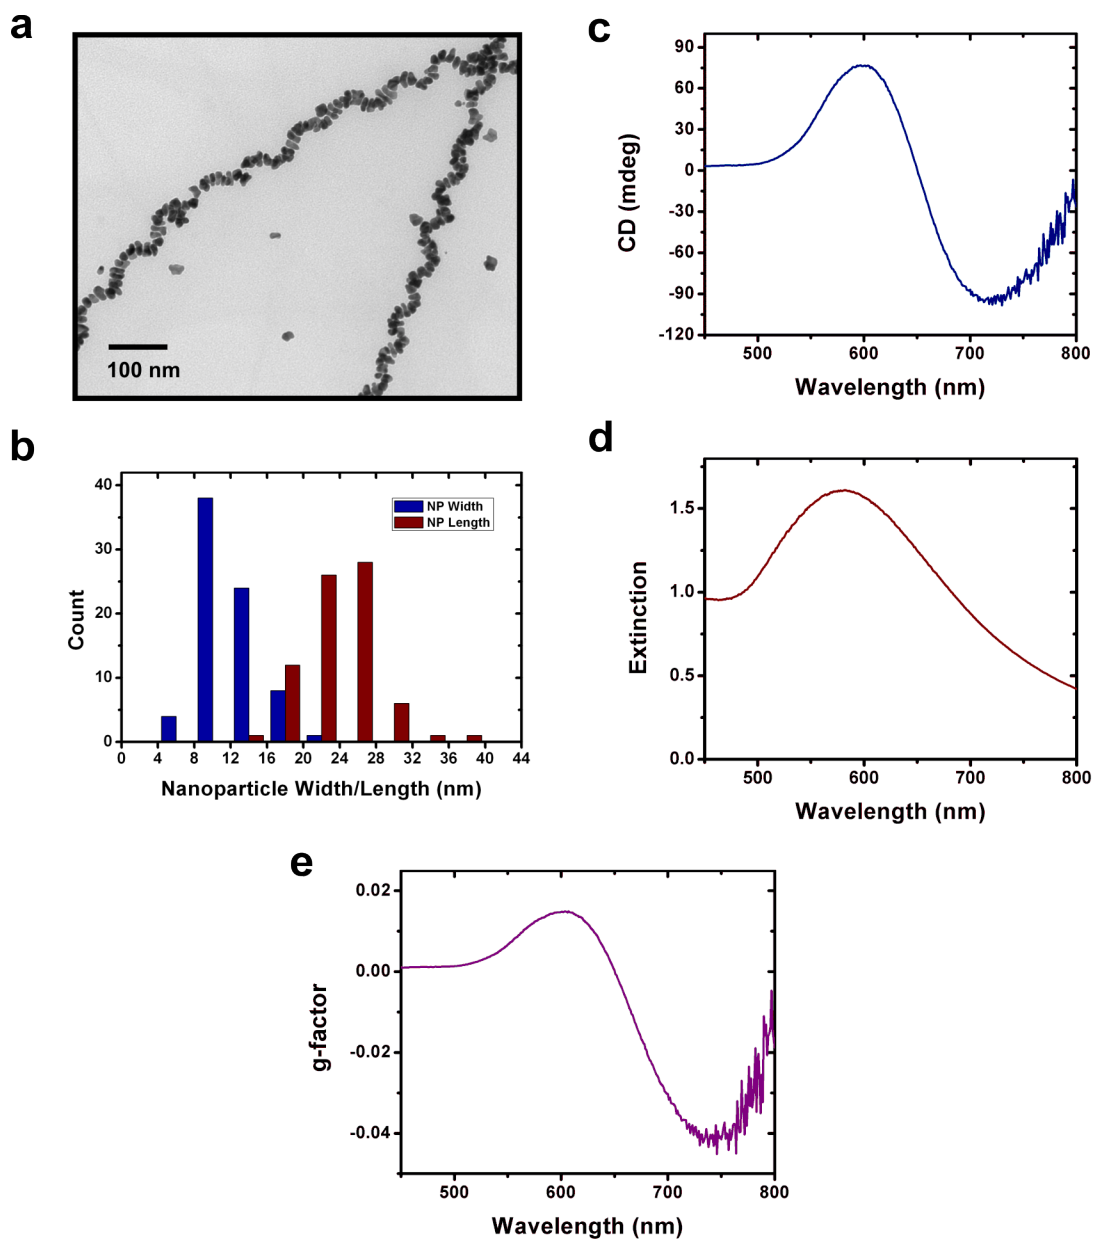

**Figure S8.** (a) TEM image of helices formed with 10 min. of sonication and 20 min. of incubation prior to  $\text{HAuCl}_4/\text{TEAA}$  addition. (b) The particle width and lengths were  $12.1 \pm 3.0$  nm and  $23.9 \pm 3.9$  nm, respectively (based on 75 counts, each). (c) CD spectrum of the optimized single helices exhibit a very strong CD signal. (d) UV-Vis extinction spectrum, and (e) g-factor graph showing absolute g-factor values up to 0.04.  $\text{g-factor} = \Delta\epsilon/\epsilon$ , where  $\Delta\epsilon$  is the molar circular dichroism and  $\epsilon$  is the molar extinctions.



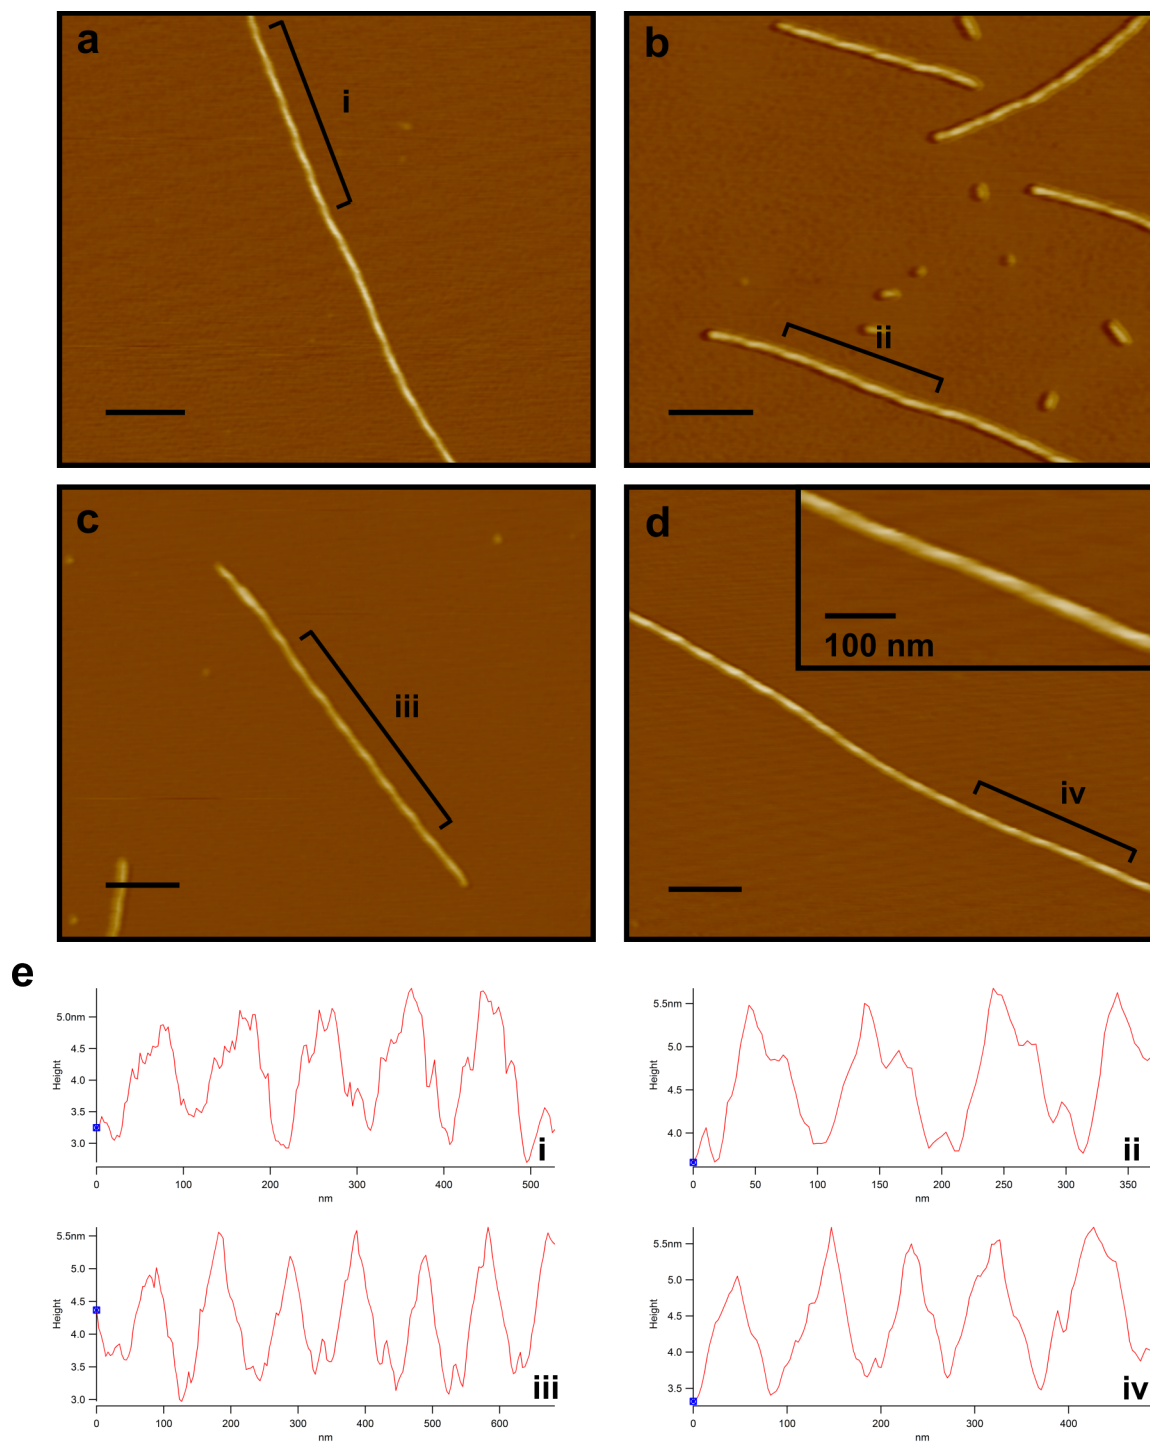

**Figure S9.** (a-d) AFM images of  $C_{18}-(PEP_{Au}^{M-Ox})_2$  fibers dispersed on APTES-functionalized mica (scale bar = 200 nm) and (e) height traces of the labeled segments.

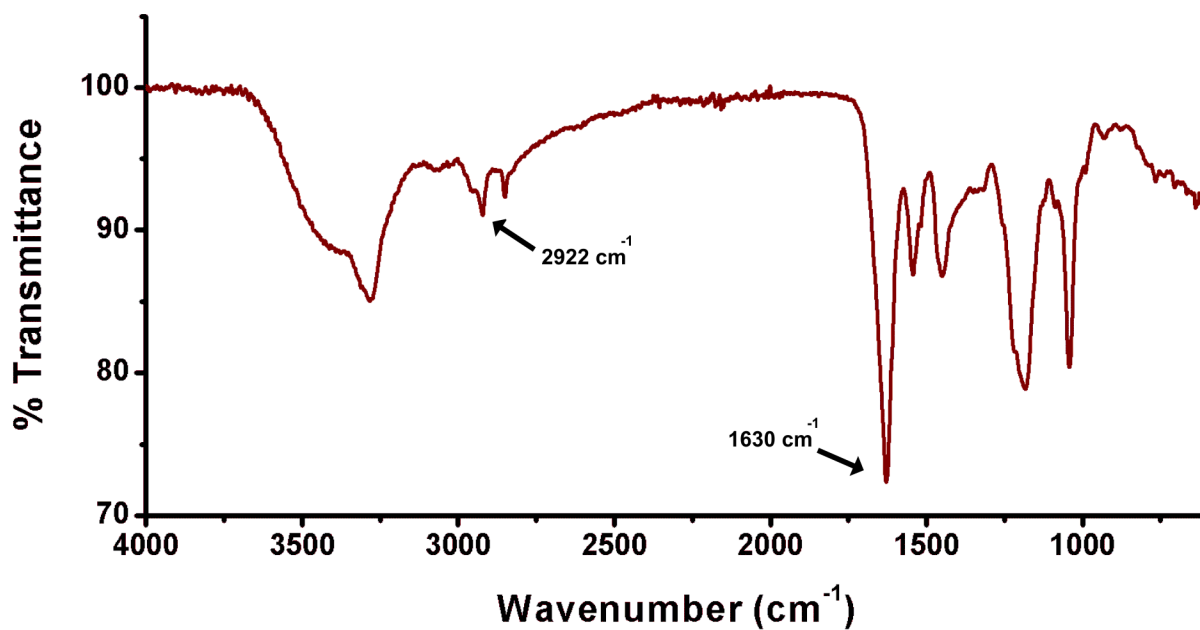

**Figure S10.** FTIR spectrum of  $C_{18}-(PEP_{Au}^{M-Ox})_2$  fibers. Peaks at  $1630\text{ cm}^{-1}$  and  $2922\text{ cm}^{-1}$  correspond to the amide I band and C-H stretch, respectively.

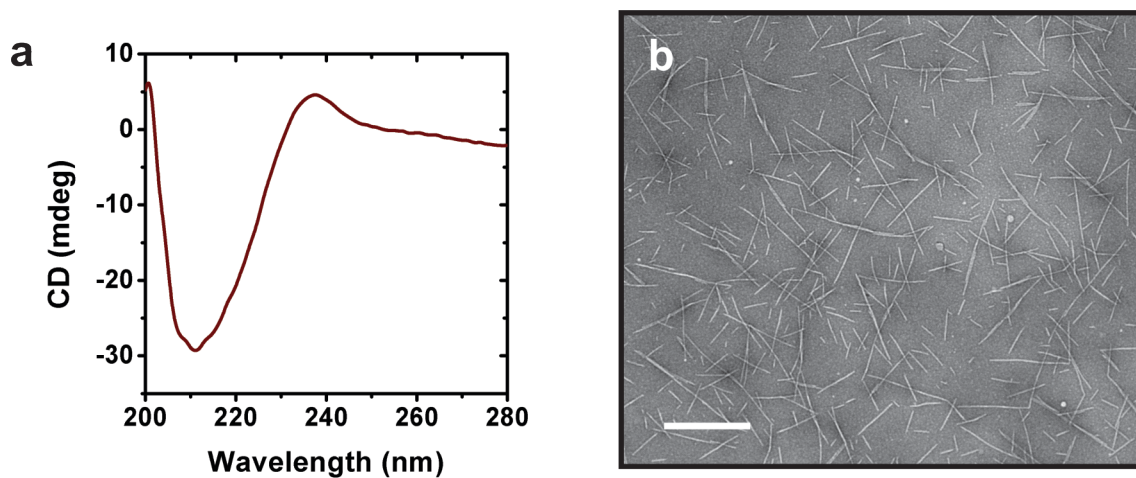

**Figure S11.** (a) CD spectrum of  $C_{18}-(PEP_{Au}^{M-Ox})_2$  in 10 mM HEPES and 1 mM  $CaCl_2$  after one day, and (b) corresponding negative stained TEM image (scale bar = 500 nm).

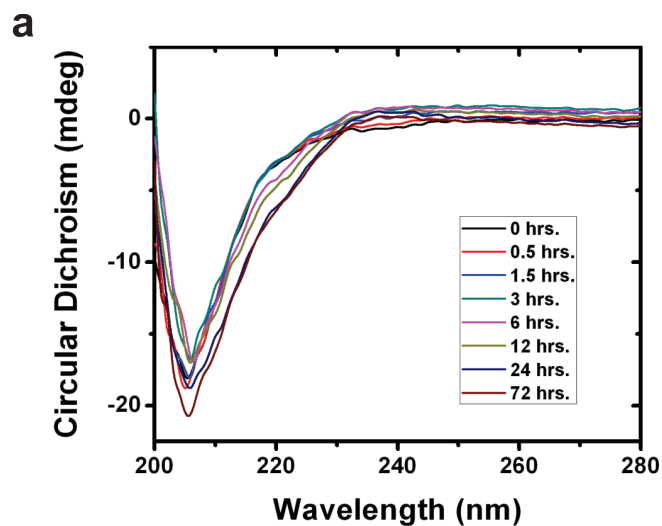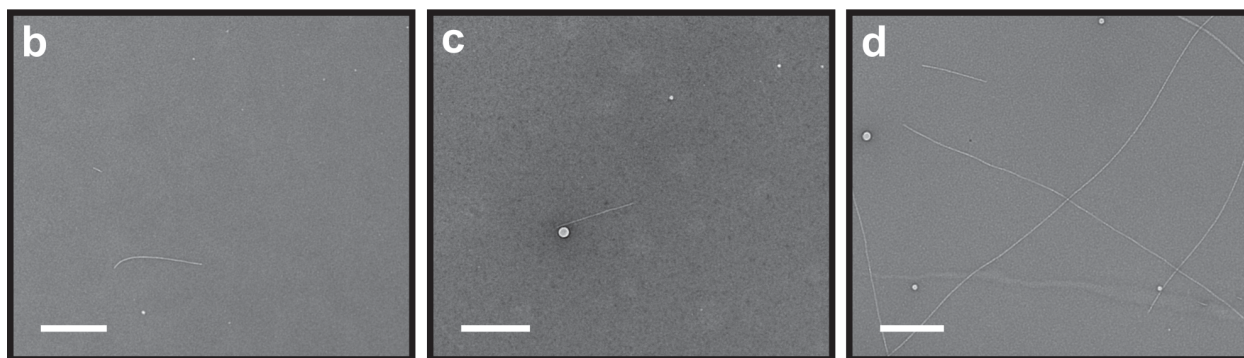

**Figure S12.** (a) CD spectra of  $C_{18}-(PEP_{Au}^{M-Ox})_2$  in 10 mM HEPES as a function of time. Negative stained TEM images after (b) 15 min., (c) 3 hrs., and (d) 72 hrs. are shown (scale bar = 500 nm). Under these conditions, fibers form very slowly, and very few fibers are observed at early time points.

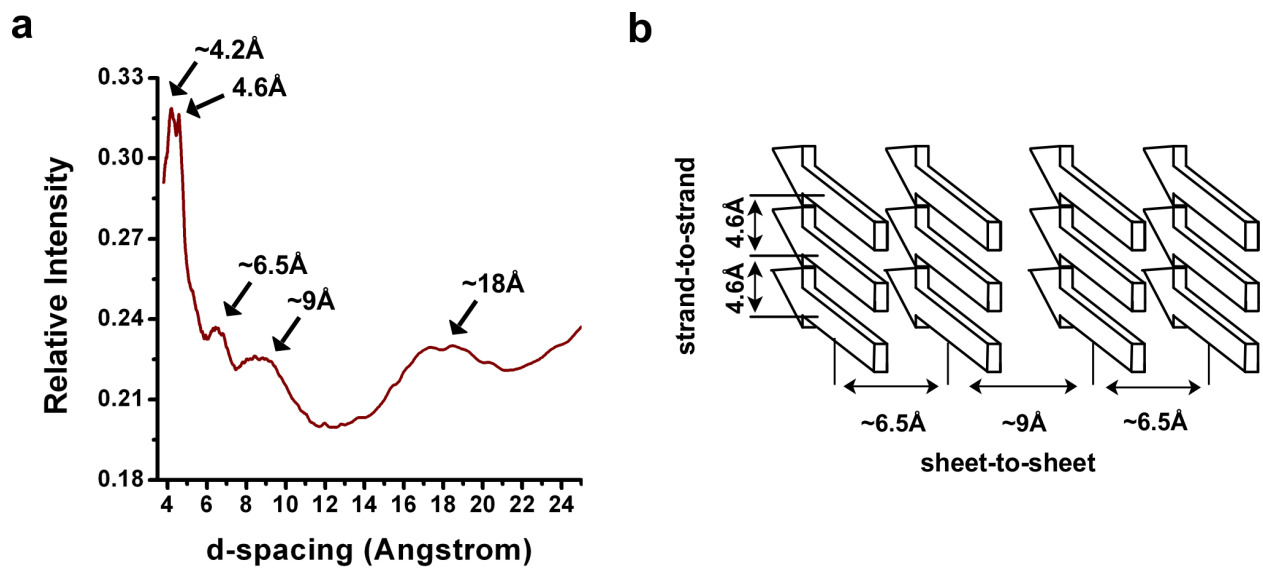

**Figure S13.** (a) Integrated d-spacings of the XRD diffractogram. (b) Figure showing the strand-to-strand and sheet-to-sheet distances as revealed via XRD.

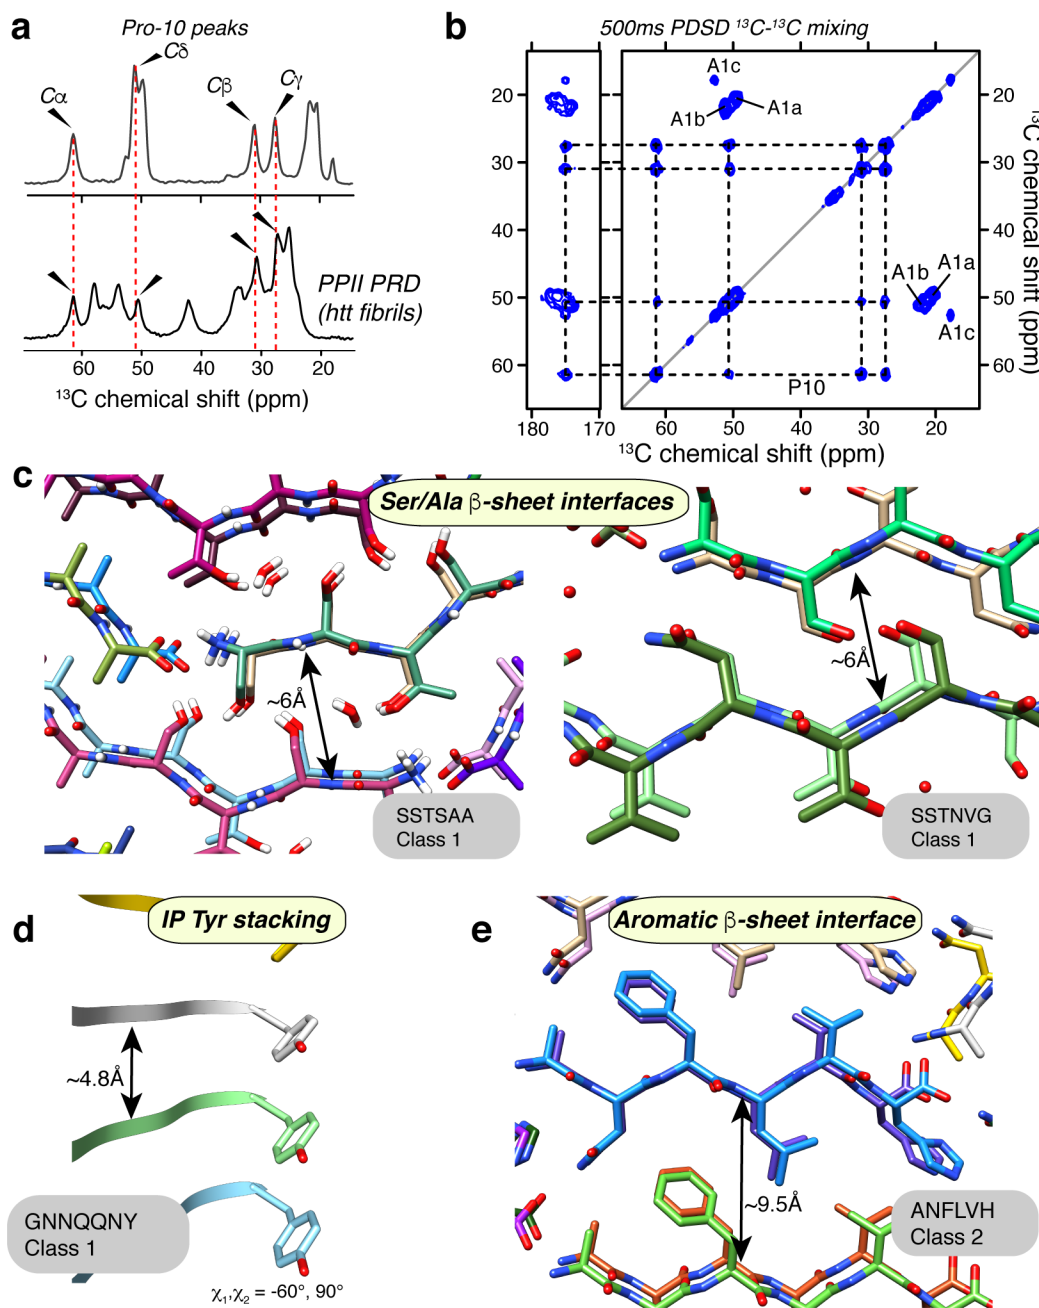

**Figure S14.** Additional ssNMR results and structural reference. (a) Aliphatic  $^{13}\text{C}$  1D MAS ssNMR spectrum of the site-specifically labeled  $\text{C}_{18}\text{-(PEP}_{\text{Au}}^{\text{M-Ox}})_2$  assemblies (top), with the P10 peaks indicated. Bottom: ssNMR spectrum of fibrillar huntingtin exon1-derived peptide  $\text{htt}^{\text{NT}}\text{Q}_{30}\text{P}_{10}\text{K}_2$ , with  $^{13}\text{C}$ ,  $^{15}\text{N}$ -labeled Pro P48 (Adapted from ref.<sup>1</sup>). In both cases the labeled Pro is part of a PPII helix that flanks the  $\beta$ -sheet amyloid core. (b) Long-mixing 500ms PDSD 2D

ssNMR spectrum on the labeled  $C_{18}-(PEP_{Au}^{M-Ox})_2$  assemblies. Compared to the short-mixing spectrum (Figure 5b) only new intra-residue P10 peaks are observed, with no contacts between the distinct A1 conformers. (c) Compact zipper interfaces mediated by Ser and other small amino acids in amyloid-like crystals of peptides SSTSAA and SSTNVG from RNase and IAPP.<sup>2</sup> The compact 6 Å inter-sheet distance is indicated. (d) Tyr ring stacking in GNNQQNY in-register parallel (IP)  $\beta$ -sheets.<sup>3</sup> (e) Amyloid interfaces featuring aromatic residues generate wider 9-10 Å inter-sheet distances. Illustrated for Phe in this Class-2 amyloid-like crystal of peptide ANFLVH.<sup>4</sup> The PDB entries for the four peptide crystal structures are 2ONW, 3DG1, 1YJP, and 5E5X.

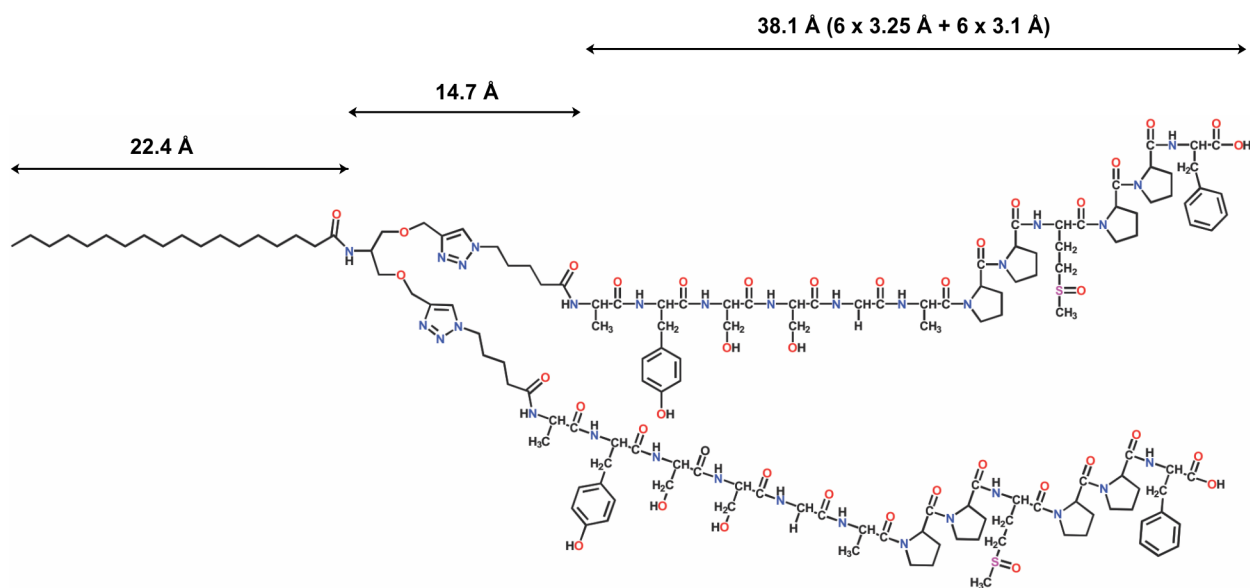

**Figure S15.** Length of the different extended segments of  $C_{18}-(PEP_{Au}^{M-Ox})_2$ . The total length of the extended molecule is  $\sim 7.5$  nm. The length measurement of the peptide portion takes into account the average length spanned by one amino acid in both the parallel  $\beta$ -sheet ( $3.25 \text{ \AA}$ )<sup>5</sup> and the PPII ( $3.1 \text{ \AA}$ )<sup>6</sup> secondary structure.

**Table S1. Detailed experimental conditions of the MAS ssNMR experiments.** *Abbreviations: NS, number of scans; Set Temp, set temperature of cooling gas; MAS, magic angle spinning rate; RD, recycle delay; TPPM, two-pulse phase-modulated <sup>1</sup>H decoupling power during evolution and acquisition ; t<sub>1</sub> evol., number of evolution time increments and increment size in the indirect dimension.*

| Figure | Expt.                                       | NS   | Set Temp (K) | MAS (kHz) | RD (s) | TPPM (kHz) | t <sub>1</sub> evol. (μs) | DARR mixing time (ms) | <sup>1</sup> H- <sup>13</sup> C Contact time (ms) |
|--------|---------------------------------------------|------|--------------|-----------|--------|------------|---------------------------|-----------------------|---------------------------------------------------|
| 5b     | 2D <sup>13</sup> C- <sup>13</sup> C CP-DARR | 64   | 277          | 10        | 3      | 83         | 562*35.6                  | 20                    | 2                                                 |
| S14-a  | <sup>1</sup> H- <sup>13</sup> C CP          | 1024 | 277          | 10        | 3      | 83         | NA                        | NA                    | 2                                                 |
| S14-b  | 2D <sup>13</sup> C- <sup>13</sup> C PDS     | 64   | 277          | 10        | 3      | 83         | 562*33.11                 | 500                   | 2                                                 |

## References

1. Hoop, C. L.; Lin, H.-K.; Kar, K.; Hou, Z.; Poirier, M. A.; Wetzal, R.; van der Wel, P. C. A. *Biochemistry* **2014**, *53* (42), 6653-6666.
2. Sawaya, M. R.; Sambashivan, S.; Nelson, R.; Ivanova, M. I.; Sievers, S. A.; Apostol, M. I.; Thompson, M. J.; Balbirnie, M.; Wiltzius, J. J. W.; McFarlane, H. T.; Madsen, A. O.; Riek, C.; Eisenberg, D. *Nature* **2007**, *447* (7143), 453-457.
3. Nelson, R.; Sawaya, M. R.; Balbirnie, M.; Madsen, A. O.; Riek, C.; Grothe, R.; Eisenberg, D. *Nature* **2005**, *435* (7043), 773-778.
4. Soriaga, A. B.; Sangwan, S.; Macdonald, R.; Sawaya, M. R.; Eisenberg, D. *The Journal of Physical Chemistry B* **2015**.
5. Nesloney, C. L.; Kelly, J. W. *Bioorganic & Medicinal Chemistry* **1996**, *4* (6), 739-766.
6. Adzhubei, A. A.; Sternberg, M. J. E.; Makarov, A. A. *Journal of Molecular Biology* **2013**, *425* (12), 2100-2132.
